# Supplementary material for: In situ tailored strategy to remove capping agents from copper sulfide for building better lithium–sulfur batteries
Source: Royal Society of Chemistry journal article supplement (doi:10.1039/d1ta10105f), 2022-01-01
Supplement: d1ta10105f1.pdf [file d1ta10105f1.pdf]

## ***In-situ* tailored strategy to remove capping agents from copper sulfide for building better lithium-sulfur batteries**

Yuwei Zhao,<sup>a, +</sup> Donghai Wu,<sup>b, +</sup> Tingting Tang,<sup>a, +</sup> Chongguang Lyu,<sup>a</sup> Junfeng Li,<sup>c</sup>  
Shunping Ji,<sup>c</sup> Cheng-zong Yuan,<sup>c</sup> Kwan San Hui,<sup>d</sup> Chenyang Zha,<sup>a,c,\*</sup> Kwun Nam  
Hui,<sup>c,\*</sup> Houyang Chen,<sup>e,\*</sup>

<sup>a</sup> Key Laboratory of Flexible Electronics (KLOFE), Institute of Advanced Materials (IAM), Nanjing Tech University, Nanjing 211816, Jiangsu, China

<sup>b</sup> Henan Key Laboratory of Nanocomposites and Applications, Institute of Nanostructured Functional Materials, Huanghe Science and Technology College, Zhengzhou 450006, Henan, China

<sup>c</sup> Institute of Applied Physics and Materials Engineering (IAPME), University of Macau, Taipa, Macau SAR, 999078, China

<sup>d</sup> Engineering, Faculty of Science, University of East Anglia, Norwich, NR4 7TJ, United Kingdom.

<sup>e</sup> Department of Chemical and Biological Engineering, State University of New York at Buffalo, Buffalo, NY 14260-4200, USA.

<sup>+</sup> These authors contributed equally to this article

<sup>\*</sup> Corresponding authors:

iamcyzha@njtech.edu.cn (C. Zha)

chenyangzha@um.edu.mo (C. Zha)

bizhui@um.edu.mo (K.N. Hui)

hchen23@buffalo.edu (H. Chen)

## Contents

|               |     |
|---------------|-----|
| Table S1..... | S3  |
| Fig. S1.....  | S4  |
| Fig. S2.....  | S5  |
| Fig. S3.....  | S6  |
| Fig. S4.....  | S7  |
| Fig. S5.....  | S8  |
| Fig. S6.....  | S9  |
| Fig. S7.....  | S10 |
| Fig. S8.....  | S11 |

**Table S1.** Electrochemical performances of Li-S batteries using C-Cu<sub>1.93</sub>S as cathode and previously reported Li-S batteries (all cells are charged at first).

| Cathode catalyst          | S loading [mg/cm <sup>2</sup> ] | Specific capacities [mAh/g]    | Cycling stability [mAh/g] | Reference                                           |
|---------------------------|---------------------------------|--------------------------------|---------------------------|-----------------------------------------------------|
| C-Cu <sub>1.93</sub> S    | 1.0                             | 1207 at 0.8 mA/cm <sup>2</sup> | 580 after 500 cycles      | <b>This work</b>                                    |
|                           | 2.0                             | 1023 at 0.8 mA/cm <sup>2</sup> | 610 after 500 cycles      |                                                     |
| TiS <sub>2</sub> -NSC     | 2.5                             | 1210 at 0.2 C                  | 920 after 120 cycles      | <i>Adv. Energy</i>                                  |
|                           | 2.5                             | 1019 at 1 C                    | 695 after 200 cycles      | <i>Mater.</i> 2019, 9,                              |
| TiS <sub>2</sub> -NSC-CFs | 5.3                             | 1045 at 0.1 C                  | 734 after 200 cycles      | 1901872.                                            |
|                           | 7.7                             | 1025 at 0.1 C                  | 767 after 100 cycles      |                                                     |
| NiS-C-HS                  | 1.0                             | 1002 at 0.2 C                  | 718 after 200 cycles      | <i>Adv. Funct.</i>                                  |
|                           | 2.3                             | 723 at 0.5 C                   | 695 after 300 cycles      | <i>Mater.</i> 2017, 27,<br>1702524.                 |
| ZnS-FeS/NC                | 2.01                            | Not given at 0.2 C             | 823 after 200 cycles      | <i>J. Mater. Chem.</i>                              |
|                           | 2.40                            | Not given at 0.2 C             | 811 after 200 cycles      | <i>A</i> , 2020, 8,433.                             |
|                           | 3.34                            | Not given at 0.2 C             | 796 after 200 cycles      |                                                     |
| VS-NT                     | 6.4                             | 944.9 at 0.2 C                 | 661 after 200 cycles      | <i>ACS Energy Lett.</i>                             |
|                           | 9.6                             | 1356 at 0.1 C                  | 952 after 120 cycles      | 2019, 4, 755-762.                                   |
| SnS <sub>2</sub> -ND/G    | 2.5                             | 1234 at 0.2 C                  | 1016 after 300 cycles     | <i>J. Mater. Chem.</i><br><i>A</i> , 2018, 6, 7659. |
| ZnS-CB                    | 1.37                            | 876 at 2 C                     | 632 after 1000 cycles     | <i>Nano Energy</i> ,                                |
|                           | 1.37                            | 657 at 5 C                     | 388 after 1000 cycles     | 2018, 51, 73.                                       |
| G-VS <sub>2</sub>         | 1.0                             | 1270 at 1 C                    | 923 after 150 cycles      | <i>Adv. Energy</i>                                  |
|                           | 2.0                             | 786 at 1 C                     | 559 after 150 cycles      | <i>Mater.</i> , 2018,                               |
|                           | 3.5                             | 701 at 1 C                     | 520 after 150 cycles      | 1800201.                                            |
| G-Cu <sub>2</sub> S-S-C   | 3.5                             | 953 at 0.5 C                   | 720 after 300 cycles      | <i>J. Mater. Chem.</i>                              |
|                           |                                 | 809 at 1 C                     | 580 after 800 cycles      | <i>A</i> , 2019, 7, 12815.                          |
|                           |                                 | 635 at 2 C                     | 441 after 800 cycles      |                                                     |

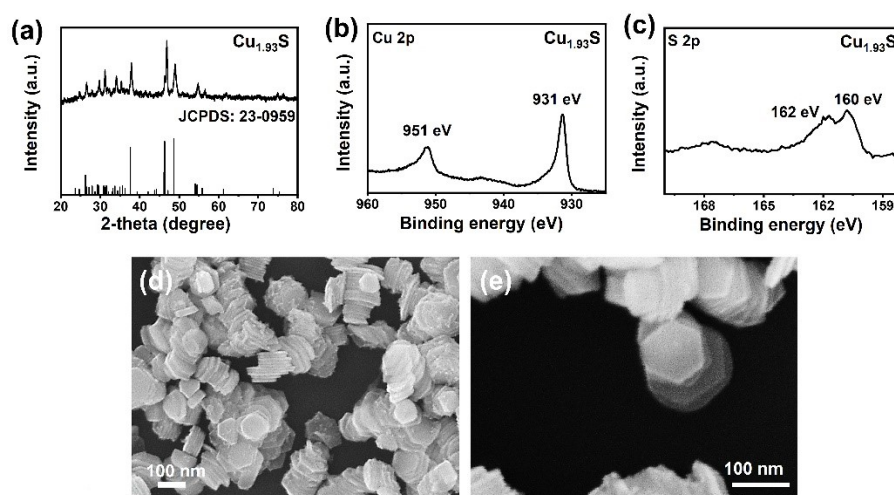

**Fig. S1.** Structural characterizations of  $\text{Cu}_{1.93}\text{S}$ . The XRD pattern (a), XPS spectra of Cu 2p (b) and S 2p (c), SEM images (d-e).

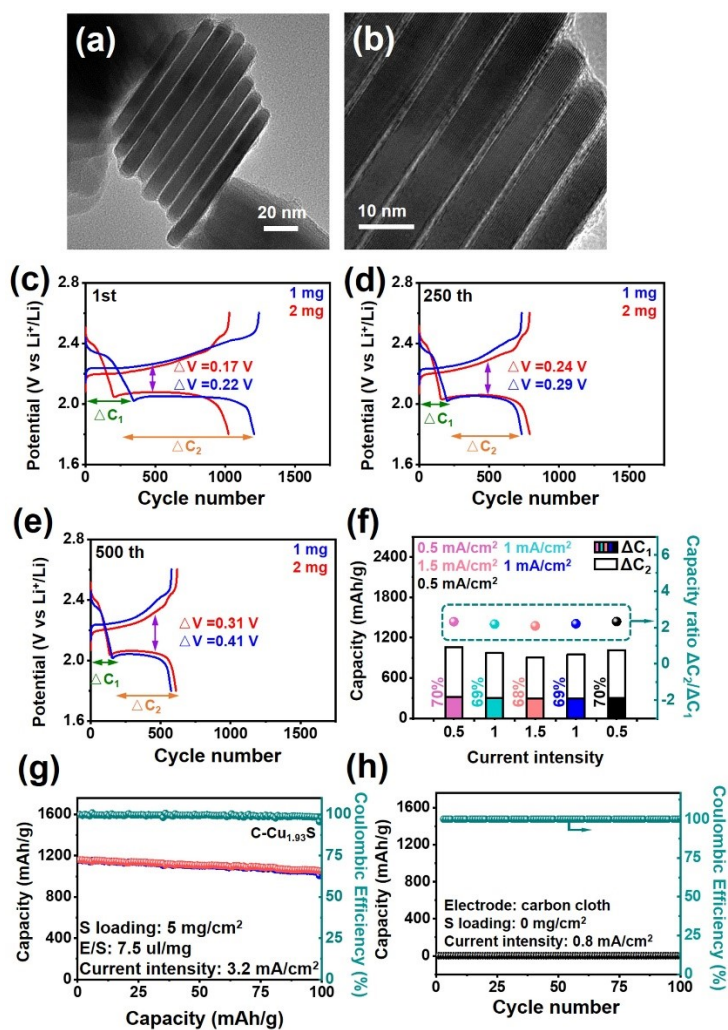

**Fig. S2.** TEM images (a-b) of C-Cu<sub>1.93</sub>S. The charge and discharge profiles at 1st (c), 250th (d) and 500th (e) of C-Cu<sub>1.93</sub>S-based Li-S cells under different sulfur loading. The C-Cu<sub>1.93</sub>S-based Li-S cell with capacity ratios image (f) of ΔC<sub>2</sub>/ΔC<sub>1</sub> under different current. The cycling stability and Coulombic efficiency (g) of C-Cu<sub>1.93</sub>S-based Li-S cells. The cycling stability and Coulombic efficiency (h) of pure carbon cloth-based cells.

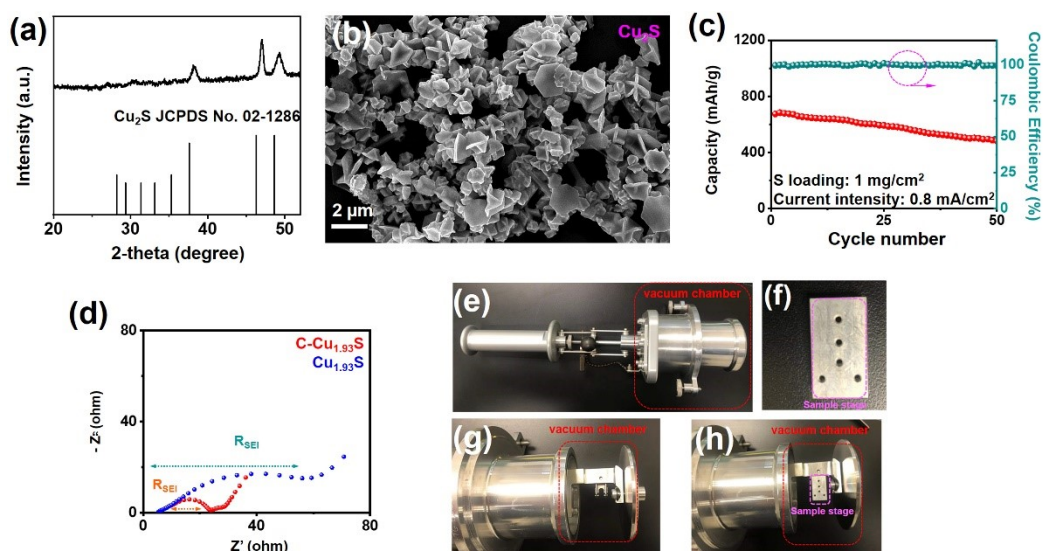

**Fig. S3.** XRD pattern (a), SEM image (b) of Cu<sub>2</sub>S materials, and cycling performance of Cu<sub>2</sub>S-based cell (c). The EIS of C-Cu<sub>1.93</sub>S and Cu<sub>1.93</sub>S-based symmetric cells (d). Optical photographs (e-h) of in-situ technology-based chamber of XPS.

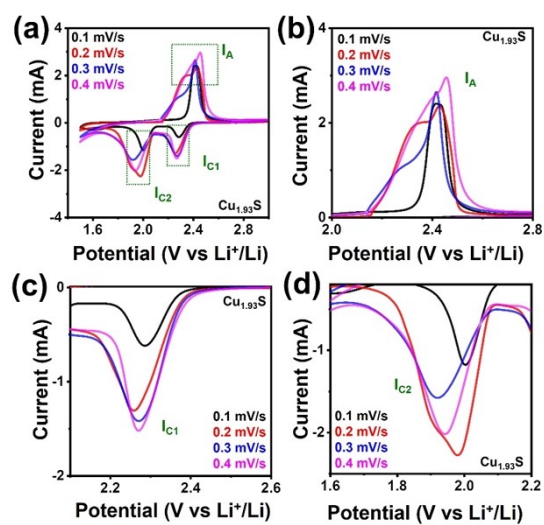

**Fig. S4.** Rated CV curves from 0.1 to 0.4 mV/s (a) with the corresponding magnified redox peaks (b-d).

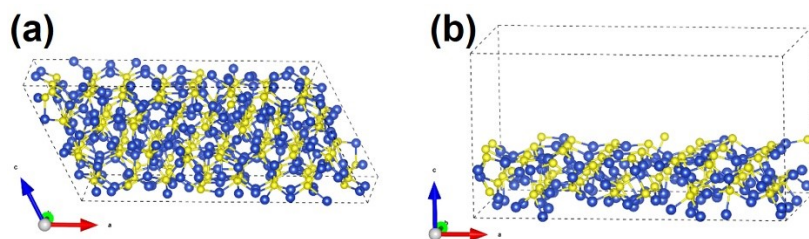

**Fig. S5.** Crystal structure of C-Cu<sub>1.93</sub>S.



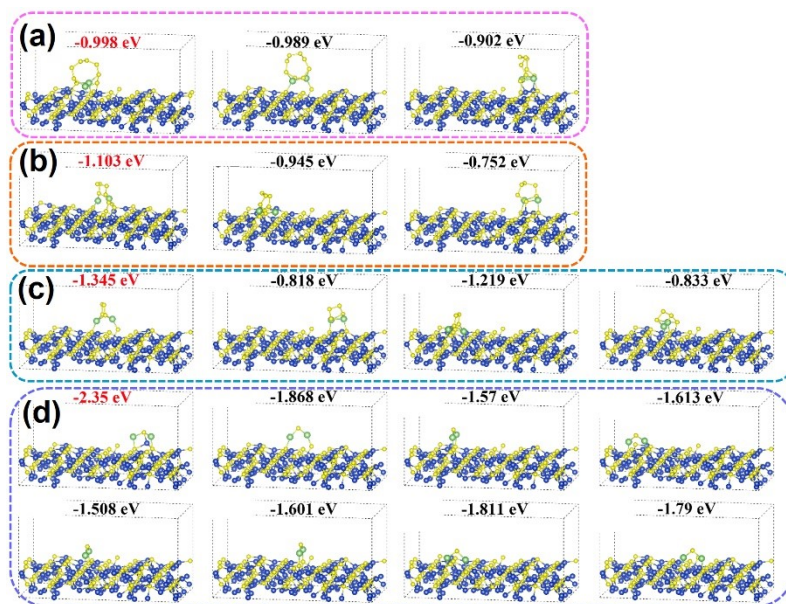

**Fig. S6.** Several possible configurations of  $\text{Li}_2\text{S}_8$  (a),  $\text{Li}_2\text{S}_6$  (b),  $\text{Li}_2\text{S}_4$  (c) and  $\text{Li}_2\text{S}$  (d) adsorption on the  $\text{Cu}_{1.93}\text{S}$  (004) surface.

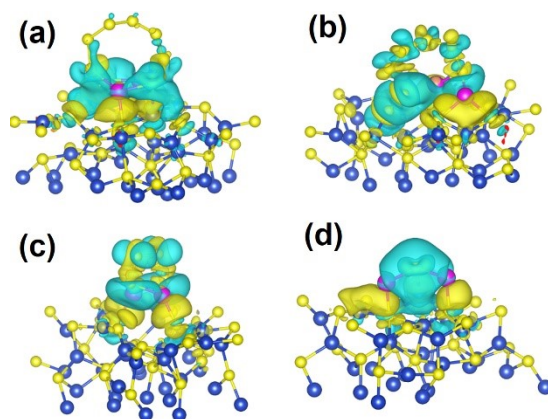

**Fig. S7.** The charge density difference of the energy most favorable configurations for  $\text{Li}_2\text{S}_8$  (a),  $\text{Li}_2\text{S}_6$  (b),  $\text{Li}_2\text{S}_4$  (c), and  $\text{Li}_2\text{S}$  (d) adsorption on  $\text{Cu}_{1.93}\text{S}$  (004) surface. Cyan and yellow regions represent the charge depletion and accumulation in space, respectively.

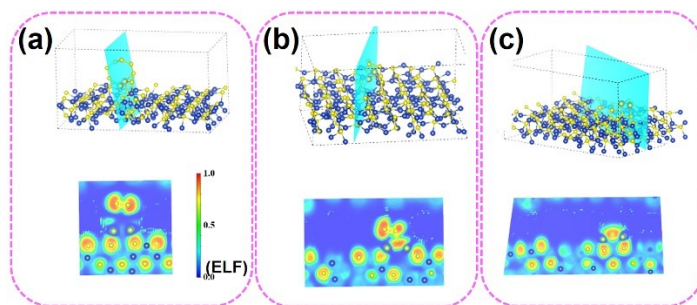

**Fig. S8.** The electron local function plots of the energy most favorable configurations of a pure  $\text{Cu}_{1.93}\text{S}$  (004) surface with the adsorption of  $\text{Li}_2\text{S}_8$  (a),  $\text{Li}_2\text{S}_6$  (b), and  $\text{Li}_2\text{S}$  (c).
